# Supplementary material for: Chemoselective homologative preparation of trisubstituted alkenyl halides from carbonyls and carbenoids
Source: Royal Society of Chemistry journal article supplement (doi:10.1039/d4cc05937a), 2024-12-06

## 2D spectral data

Compound 2

(4-bromo-1-[(1*E*)-1-chloro-1-propen-2-yl]benzene)

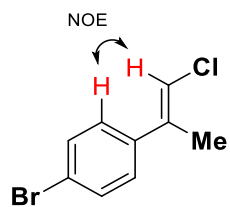

$^1\text{H}$ - $^1\text{H}$  NOESY ( $\text{CDCl}_3$ )

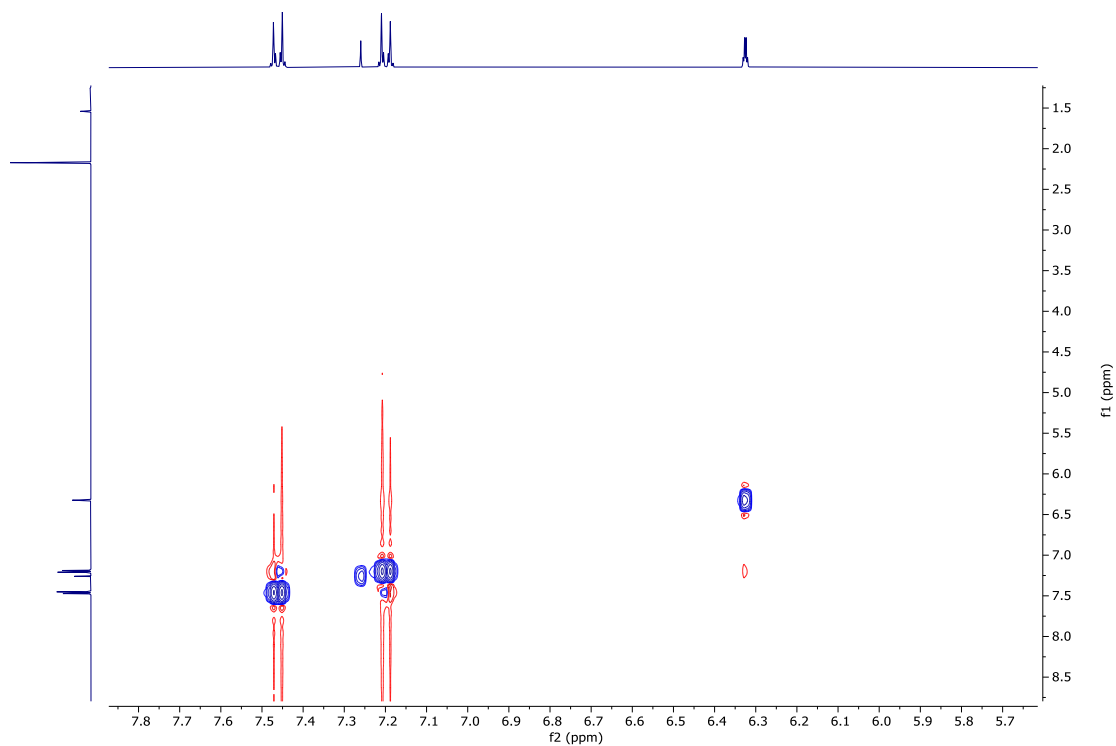

Compound 12

[(1Z)-1-chloro-3,3-dimethyl-1-buten-2yl] benzene

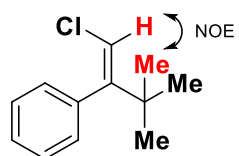

$^1\text{H}$ - $^1\text{H}$  NOESY ( $\text{CDCl}_3$ )

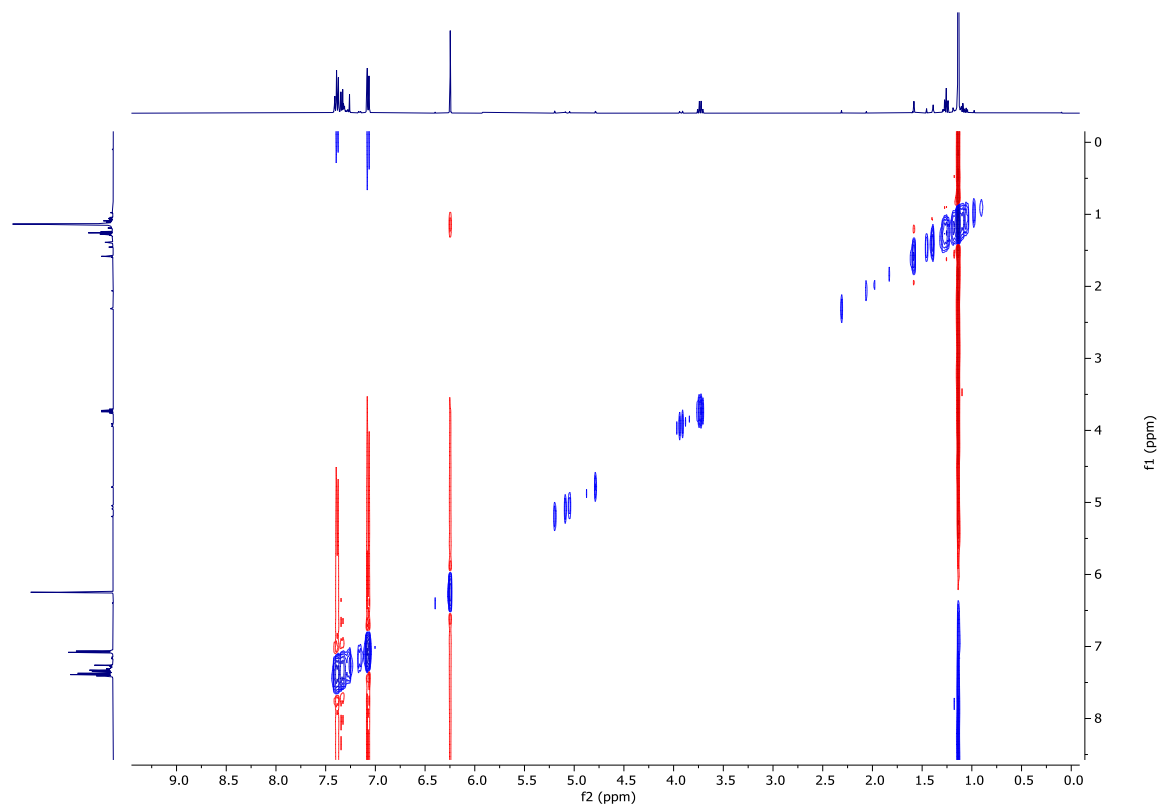

## Compiund 16

### 1-[(Z)-(2-chloro-1-phenylvinyl)-4-methoxybenzene

characterization as report in the literature.<sup>1</sup>

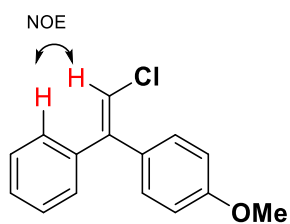

(1) Liu, C.; Xue, Y.; Ding, L.; Zhang, H.; Yang, F. *Eur. J. Org. Chem.* **2018**, 6537-6540.

### <sup>1</sup>H-<sup>1</sup>H NOESY (CDCl<sub>3</sub>)

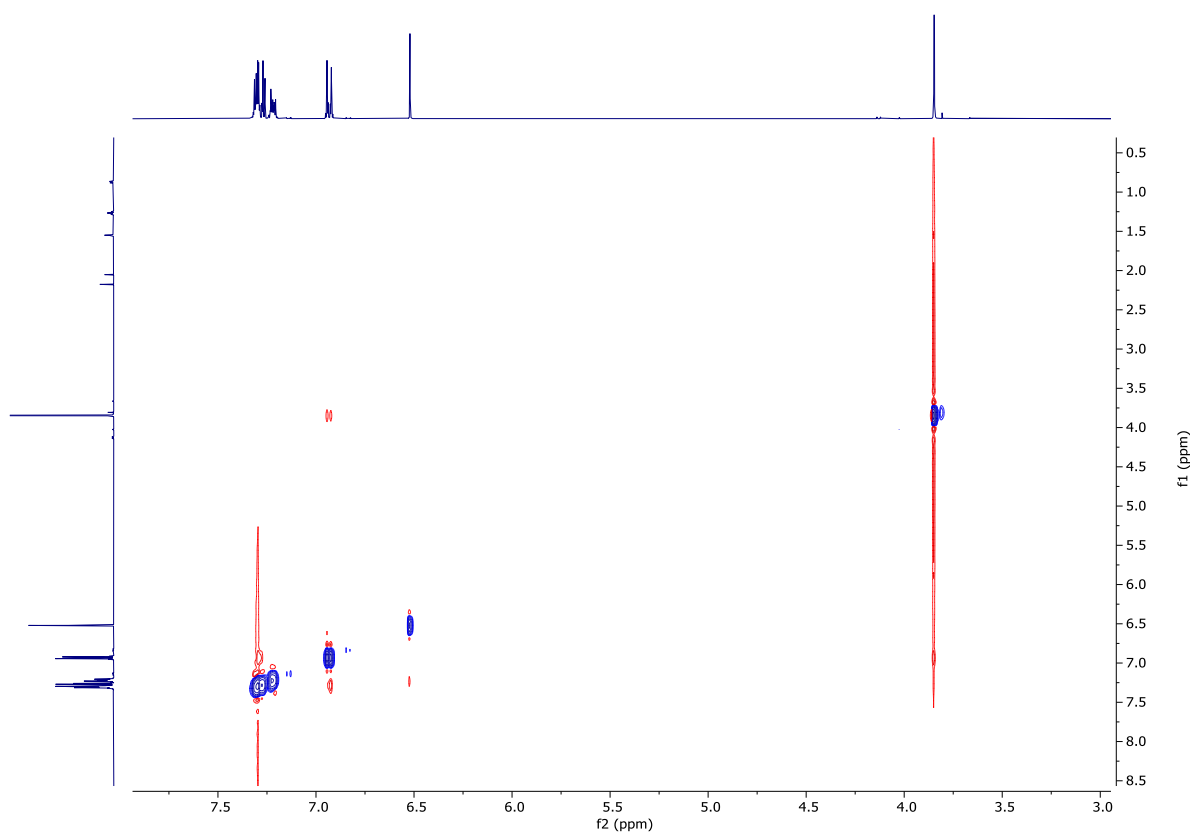

Compound 23

7-chloro-9-((E)chloromethylene)-9H-thioxanthene

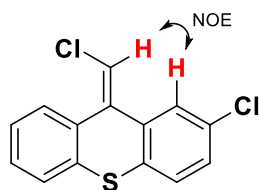

$^1\text{H}$ - $^1\text{H}$  NOESY ( $\text{CDCl}_3$ )

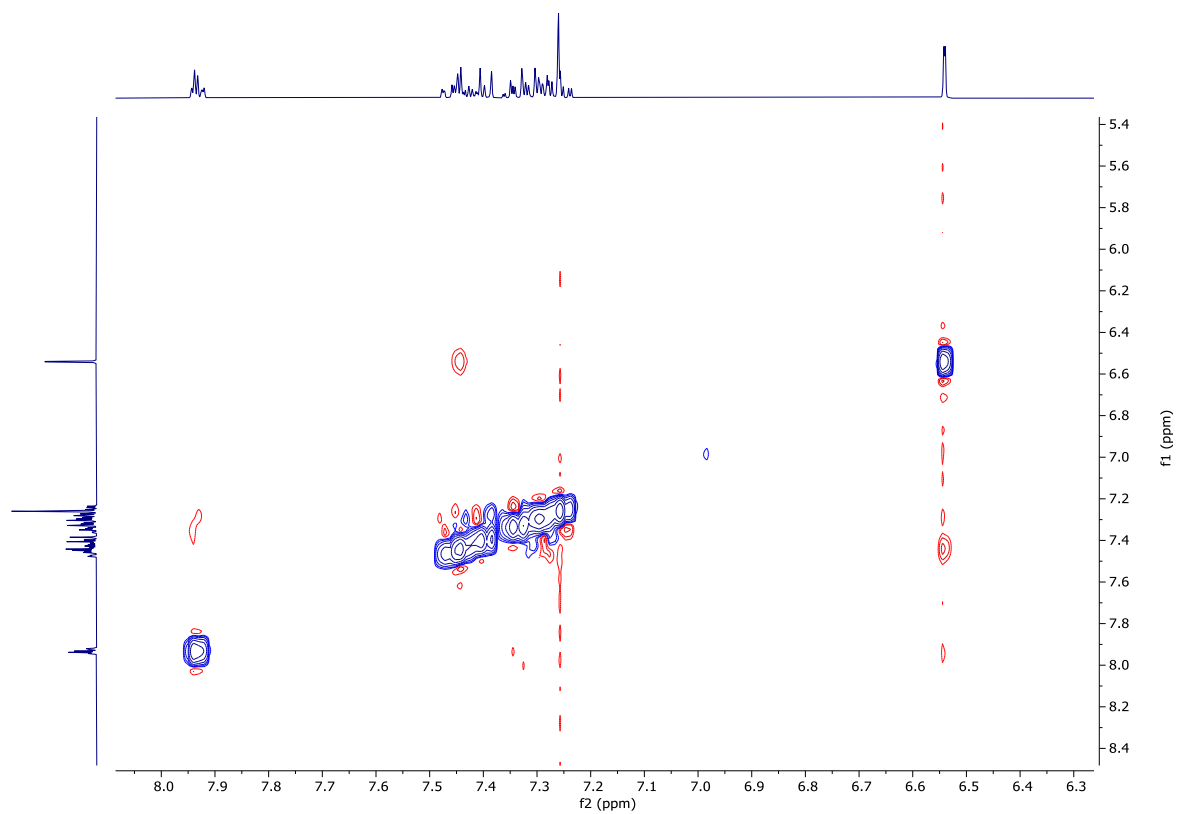

Supplement: d4cc05937a1.pdf [file d4cc05937a1.pdf]
